# Supplementary material for: Decreased absorption of midazolam in the stomach due to low pH induced by co-administration of Banha-sasim-tang
Source: PubMed Central journal article supplement — Environ Health Toxicol. 2016 Aug 9;31:e2016016. doi: 10.5620/eht.e2016016 (PMC5080787; doi:10.5620/eht.e2016016), 2016-08-09
Supplement: eht-31-e2016016-supple1.pdf [file eht-31-e2016016-supple1.pdf]

**Table S1.** The accuracy and RSD of quality control samples of MDZ and 1'-OH MDZ

|           | Theoretical concentration ( $\mu\text{g/mL}$ ) | Concentration observed ( $\mu\text{g/mL}$ ) | Accuracy (%) | RSD (%) |
|-----------|------------------------------------------------|---------------------------------------------|--------------|---------|
| MDZ       | 0.05                                           | $0.06 \pm 0.00$                             | 114.3        | 2.0     |
|           | 0.5                                            | $0.49 \pm 0.03$                             | 97.3         | 5.1     |
|           | 1.0                                            | $0.96 \pm 0.09$                             | 96.2         | 9.1     |
|           | 2.0                                            | $2.02 \pm 0.06$                             | 101.1        | 3.2     |
| 1'-OH-MDZ | 0.5                                            | $0.49 \pm 0.01$                             | 99.0         | 0.9     |
|           | 1.0                                            | $1.01 \pm 0.00$                             | 100.8        | 0.8     |
|           | 2.0                                            | $1.83 \pm 0.03$                             | 91.6         | 1.4     |
|           | 5.0                                            | $5.04 \pm 0.04$                             | 100.8        | 0.8     |

RSD, relative standard deviation; MDZ, midazolam; 1'-OH-MDZ, 1'-hydroxymidazolam.
