# Supplementary material for: Decreased absorption of midazolam in the stomach due to low pH induced by co-administration of Banha-sasim-tang
Source: PubMed Central journal article supplement — Environ Health Toxicol. 2016 Aug 9;31:e2016016. doi: 10.5620/eht.e2016016 (PMC5080787; doi:10.5620/eht.e2016016), 2016-08-09
Supplement: eht-31-e2016016-supple2.pdf [file eht-31-e2016016-supple2.pdf]

**Table S2.** Effects of co-administration of BST extract on the pharmacokinetic parameters of caffeine and paraxanthine

| Parameters   | BST extract (g/kg) | Oral administration of MDZ                     |                                              |                        |                 |
|--------------|--------------------|------------------------------------------------|----------------------------------------------|------------------------|-----------------|
|              |                    | AUC ( $\mu\text{g}\cdot\text{min}/\text{mL}$ ) | $C_{\text{max}}$ ( $\mu\text{g}/\text{mL}$ ) | $T_{\text{max}}$ (min) | Half-life (min) |
| Caffeine     | 0.0                | 271.4 $\pm$ 11.8                               | 3.2 $\pm$ 0.2                                | 22.5 $\pm$ 7.5         | 69.1 $\pm$ 0.0  |
|              | 0.5                | 216.2 $\pm$ 18.4                               | 3.1 $\pm$ 0.3                                | 30.0 $\pm$ 0.0         | 48.9 $\pm$ 6.8  |
|              | 1.0                | 169.2 $\pm$ 22.7                               | 1.8 $\pm$ 0.2                                | 50.0 $\pm$ 10.0        | 88.1 $\pm$ 0.0  |
| Paraxanthine | 0.0                | 167.4 $\pm$ 2.5                                | 2.0 $\pm$ 0.1                                | 90.0 $\pm$ 30.0        | -               |
|              | 0.5                | 174.3 $\pm$ 10.7                               | 2.0 $\pm$ 0.2                                | 70.0 $\pm$ 26.5        | -               |
|              | 1.0                | 112.1 $\pm$ 11.1                               | 1.3 $\pm$ 0.1                                | 80.0 $\pm$ 20.0        | -               |

Nine male ICR mice were orally administered with caffeine (2.0 mg/kg) after 5 minutes of oral administration of BST extract (0, 0.5 or 1.0 g/kg, n=3); After the mice received caffeine, blood samples were collected from the tail vein into heparinized capillary tubes at 0.08- 0.25- 0.5- 1.0- and 2 hours; The collected bloods were immediately centrifuged at 4000 g for 10 minutes and 10  $\mu\text{L}$  of plasma was obtained for each sample and stored at  $-20^{\circ}\text{C}$  until analysis.

BST, Banha-sasim-tang; MDZ, midazolam; AUC, area under the plasma concentration-time curve;  $C_{\text{max}}$ , maximum plasma concentration;  $T_{\text{max}}$ , maximum plasma concentration.
