# Supplementary material for: Decreased absorption of midazolam in the stomach due to low pH induced by co-administration of Banha-sasim-tang
Source: PubMed Central journal article supplement — Environ Health Toxicol. 2016 Aug 9;31:e2016016. doi: 10.5620/eht.e2016016 (PMC5080787; doi:10.5620/eht.e2016016), 2016-08-09
Supplement: eht-31-e2016016-supple3.pdf [file eht-31-e2016016-supple3.pdf]

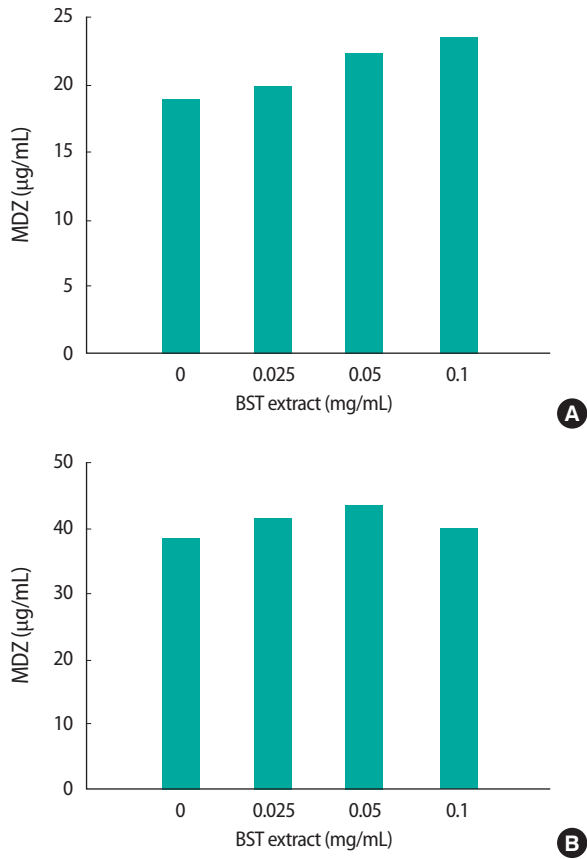

**Figure S1.** The concentration of MDZ in the supernatant of artificial gastric juice (A) and intestinal juice (B) with MDZ and BST. The data shown are the means of duplicates. MDZ, midazolam; BST, Banha-sasim-tang.
